# Supplementary material
Source: PubMed Central journal article supplement (PMC9662897)
Supplement: ccr-22-0851_supplementary_figure_s6_supps6.pdf [file ccr-22-0851_supplementary_figure_s6_supps6.pdf]

**A**

Intact (I) mice

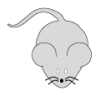

CP50

Tumor volume:  
300 to 400mm<sup>3</sup>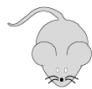Vehicle (IV) OD  
for 7 days (n=3)

Passaged in castrate (C) mice

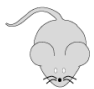

CP50C

Tumor volume:  
300 to 400mm<sup>3</sup>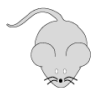Vehicle (CV) OD  
for 7 days (n=3)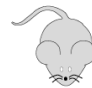Testosterone (CT)  
20mg/kg OD for 7  
days (n=3)New castrate  
line developed**B**

Intact (I) mice

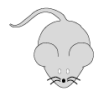

CP89

Tumor volume:  
300 to 400mm<sup>3</sup>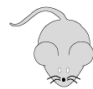Vehicle (IV) OD  
for 7 days (n=4)

Passaged in castrate (C) mice

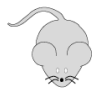

CP89C

Tumor volume:  
300 to 400mm<sup>3</sup>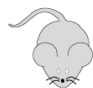Vehicle (CV) OD  
for 7 days (n=5)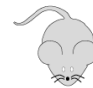Testosterone (CT)  
20mg/kg OD for 7  
days (n=5)New castrate  
line developed
