# Supplementary material
Source: PubMed Central journal article supplement (PMC9662897)
Supplement: ccr-22-0851_supplementary_tables_ts1-5_suppts1-5.pdf [file ccr-22-0851_supplementary_tables_ts1-5_suppts1-5.pdf]

**Supplementary Table 1**

| <b>ICR/RMH matched CSPC and CRPC cohort</b> |                            |                           |
|---------------------------------------------|----------------------------|---------------------------|
| <b>Baseline characteristics</b>             |                            |                           |
| <b>CSPC biopsy</b>                          | <b>RevMAb<br/>(n = 26)</b> | <b>Abcam<br/>(n = 23)</b> |
| <b>Histology (n, %)</b><br>Adenocarcinoma   | 26, 100%                   | 23, 100%                  |
| <b>Grade group (n, %)</b>                   |                            |                           |
| 1                                           | 1, 3%                      | 1, 4%                     |
| 2                                           | 1, 3%                      | 1, 4%                     |
| 3                                           | 5, 19%                     | 4, 17%                    |
| 4                                           | 3, 12%                     | 3, 13%                    |
| 5                                           | 14, 54%                    | 12, 52%                   |
| NR                                          | 2, 8%                      | 2, 9%                     |
| <b>Metastatic at diagnosis (n, %)</b>       |                            |                           |
| M0                                          | 13, 50%                    | 10, 43%                   |
| M1                                          | 8, 31%                     | 8, 35%                    |
| NR                                          | 5, 19%                     | 5, 22%                    |
| <b>Treatment intent (n, %)</b>              |                            |                           |
| Radical                                     | 12, 46%                    | 11, 48%                   |
| Palliative                                  | 14, 54%                    | 12, 52%                   |
| <b>Median diagnostic PSA (µg/l, IQR)</b>    | 29.0, 13.3-137.0*          | 28.0, 13.9-138.3*         |
| <b>Matched CRPC biopsy</b>                  | <b>RevMAb<br/>(n = 32)</b> | <b>Abcam<br/>(n = 32)</b> |
| <b>Biopsy site (n, %)</b>                   |                            |                           |
| Bone                                        | 19, 59%                    | 19, 59%                   |
| Lymph node                                  | 6, 19%                     | 6, 19%                    |
| Other                                       | 7, 22%                     | 7, 22%                    |
| <b>NHT prior to biopsy (n, %)</b>           |                            |                           |
| No                                          | 25, 78%                    | 25, 78%                   |
| Yes                                         | 7, 22%                     | 7, 22%                    |

**Supplementary Table 1. Clinical characteristics of the Institute of Cancer Research/Royal Marsden matched cohort of prostate cancer patients with paired castration-sensitive and castration-resistant tissue biopsies.** CSPC – castration-sensitive prostate cancer, CRPC – castration-resistant prostate cancer, n – number, NR – not recorded, AR – androgen receptor, PSA – prostate-specific antigen, IQR – interquartile range, \* – three patients without diagnostic PSA data available and one patient diagnostic PSA value > 2000 analyzed as 2000, NHT – Novel Hormonal Therapy (abiraterone and/or enzalutamide)

**Supplementary Table 2**

| <b>ICR/RMH primary advanced cohort</b>                         |                                |
|----------------------------------------------------------------|--------------------------------|
| <b>Baseline characteristics</b>                                |                                |
| <b>Histology (n, %)</b>                                        |                                |
| Adenocarcinoma                                                 | 22, 100%                       |
| <b>Grade group (n, %)</b>                                      |                                |
| 1                                                              | 0, 0%                          |
| 2                                                              | 2, 9%                          |
| 3                                                              | 0, 0%                          |
| 4                                                              | 5, 23%                         |
| 5                                                              | 15, 68%                        |
| <b>Metastatic at diagnosis (n, %)</b>                          |                                |
| M0                                                             | 2, 9%                          |
| M1                                                             | 18, 82%                        |
| NR                                                             | 2, 9%                          |
| <b>Treatment intent (n, %)</b>                                 |                                |
| Radical                                                        | 0, 0%                          |
| Palliative                                                     | 22, 100%                       |
| <b>Median diagnostic PSA (<math>\mu\text{g/l}</math>, IQR)</b> | 160.5, 41.6-754.0 <sup>^</sup> |

**Supplementary Table 2. Clinical characteristics of the Institute of Cancer Research/Royal Marsden Hospital primary advanced cohort of prostate cancer patients with castration-sensitive tissue biopsies.** n – number, NR – not recorded, PSA – prostate-specific antigen, IQR – interquartile range, \* – one patient diagnostic PSA value > 2000 analyzed as 2000

**Supplementary Table 3**

| <b>UW primary localized cohort</b>                        |                                               |
|-----------------------------------------------------------|-----------------------------------------------|
| <b>Baseline characteristics</b>                           |                                               |
| <b>Histology (n, %)</b><br>Adenocarcinoma                 | 26, 100%                                      |
| <b>Grade group (n, %)</b><br>1<br>2<br>3<br>4<br>5        | 9, 35%<br>7, 27%<br>6, 23%<br>0, 0%<br>4, 15% |
| <b>Tumor stage (n, %)</b><br>T1<br>T2<br>T3A<br>T3B<br>T4 | 0, 0%<br>15, 58%<br>7, 27%<br>4, 15%<br>0, 0% |
| <b>Lymph node stage (n, %)</b><br>N0<br>N1<br>Nx          | 20, 77%<br>2, 8%<br>4, 15%                    |

**Supplementary Table 3. Clinical characteristics of the University of Washington primary localized cohort of prostate cancer patients who underwent radical prostatectomies. n – number**

**Supplementary Table 4**

| <b>NCI primary localized cohort</b>                       |                                                 |
|-----------------------------------------------------------|-------------------------------------------------|
| <b>Baseline characteristics</b>                           |                                                 |
| <b>Histology (n, %)</b><br>Adenocarcinoma                 | 84, 100%                                        |
| <b>Grade group (n, %)</b><br>1<br>2<br>3<br>4<br>5        | 8, 10%<br>54, 64%<br>18, 21%<br>1, 1%<br>3, 4%  |
| <b>Tumor stage (n, %)</b><br>T1<br>T2<br>T3A<br>T3B<br>T4 | 0, 0%<br>43, 51%<br>31, 37%<br>10, 12%<br>0, 0% |
| <b>Lymph node stage (n, %)</b><br>N0<br>N1<br>Nx          | 71, 85%<br>3, 4%<br>10, 12%                     |
| <b>Median diagnostic PSA (ng/ml, IQR)</b>                 | 6.0, 5.4-8.0                                    |

**Supplementary Table 4. Clinical characteristics of the National Cancer Institute primary localized cohort of prostate cancer patients who underwent radical prostatectomy.** n – number, PSA – prostate-specific antigen, IQR – interquartile range

**Supplementary Table 5**

| <b>NCI neoadjuvant cohort</b>                             |                                                 |
|-----------------------------------------------------------|-------------------------------------------------|
| <b>Baseline characteristics</b>                           |                                                 |
| <b>Histology (n, %)</b><br>Adenocarcinoma                 | 37, 100%*                                       |
| <b>Grade group (n, %)</b><br>1<br>2<br>3<br>4<br>5        | 0, 0%<br>4, 11%<br>5, 14%<br>11, 30%<br>17, 46% |
| <b>Tumor stage (n, %)</b><br>T1<br>T2<br>T3A<br>T3B<br>T4 | 4, 11%<br>6, 16%<br>15, 41%<br>7, 19%<br>5, 14% |
| <b>Lymph node stage (n, %)</b><br>N0<br>N1<br>Nx          | 26, 70%<br>11, 30%<br>0, 0%                     |
| <b>Median diagnostic PSA (ng/ml, IQR)</b>                 | 9.3, 5.5-17.7                                   |

**Supplementary Table 5. Clinical characteristics of the National Cancer Institute neoadjuvant cohort of prostate cancer patients who received neoadjuvant androgen-deprivation therapy and enzalutamide prior to radical prostatectomy.** n – number, PSA – prostate-specific antigen, IQR – interquartile range, \* - five patients had predominant adenocarcinoma with focal neuroendocrine features
