# Supplementary material
Source: PubMed Central journal article supplement (PMC9662897)

**A**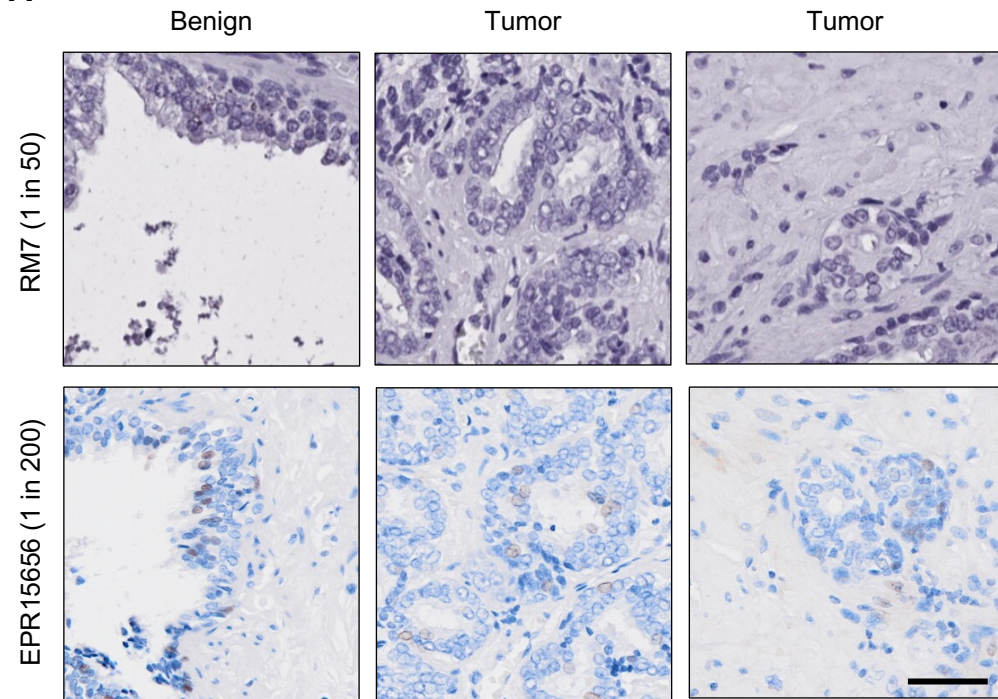**B**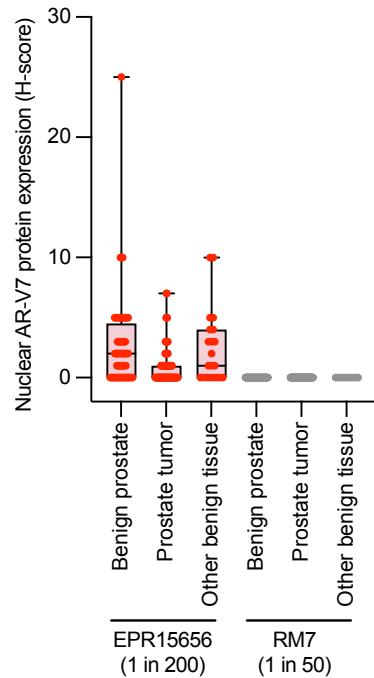

Supplement: ccr-22-0851_supplementary_figure_s10_supps10.pdf [file ccr-22-0851_supplementary_figure_s10_supps10.pdf]

A

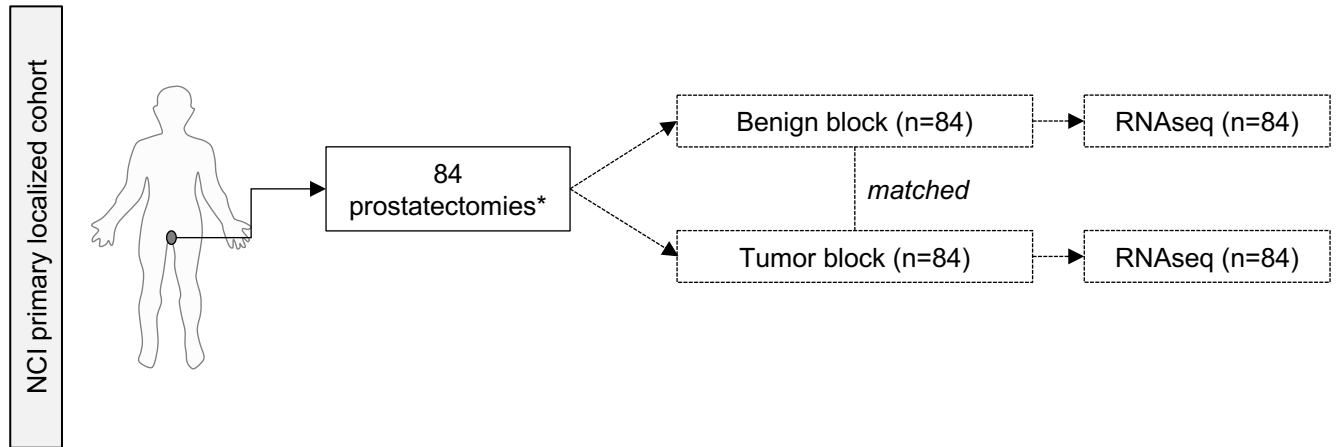

B

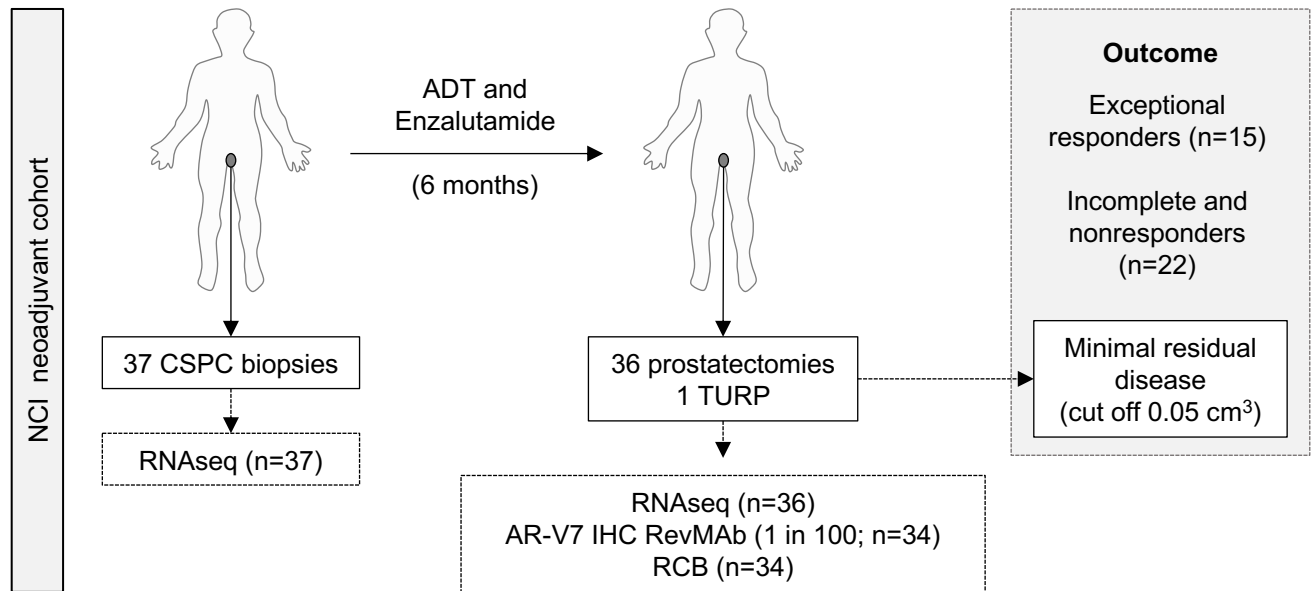

Supplement: ccr-22-0851_supplementary_figure_s11_supps11.pdf [file ccr-22-0851_supplementary_figure_s11_supps11.pdf]

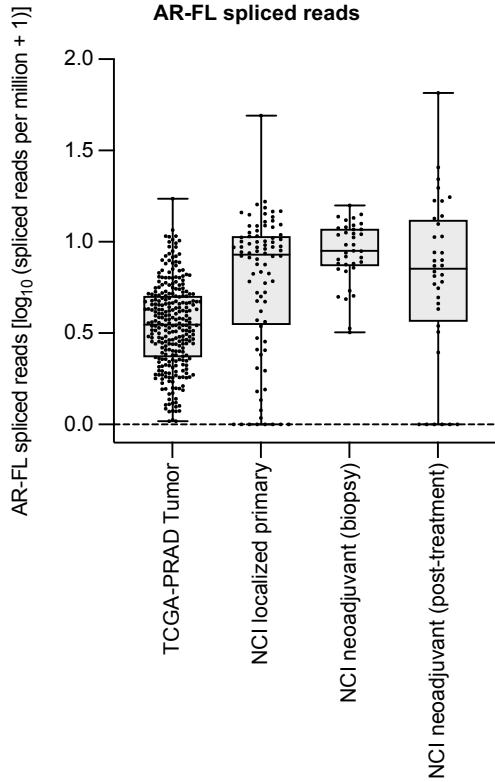

Supplement: ccr-22-0851_supplementary_figure_s12_supps12.pdf [file ccr-22-0851_supplementary_figure_s12_supps12.pdf]

# Supplementary figure 1

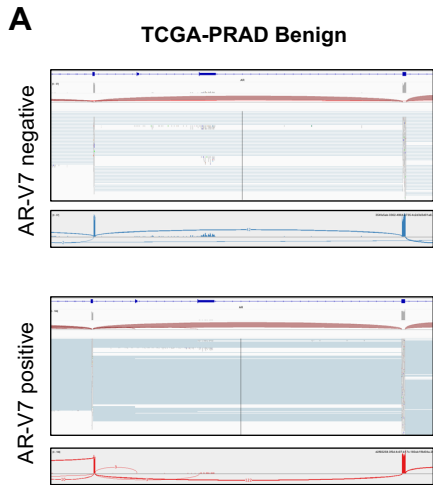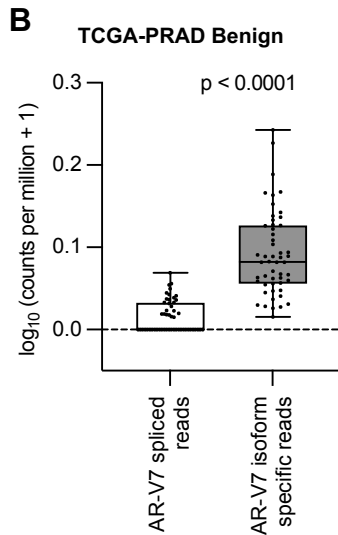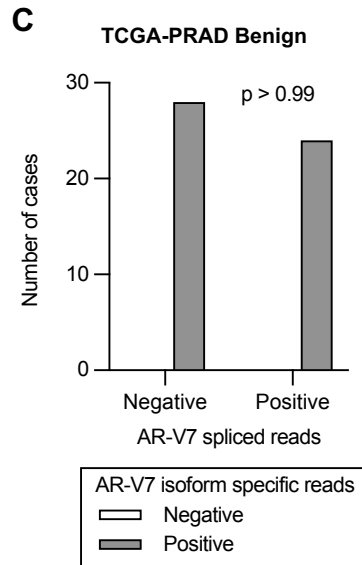

Supplement: ccr-22-0851_supplementary_figure_s1_supps1.pdf [file ccr-22-0851_supplementary_figure_s1_supps1.pdf]

# Supplementary figure 2

ICR/RMH matched CSPC and CRPC cohort

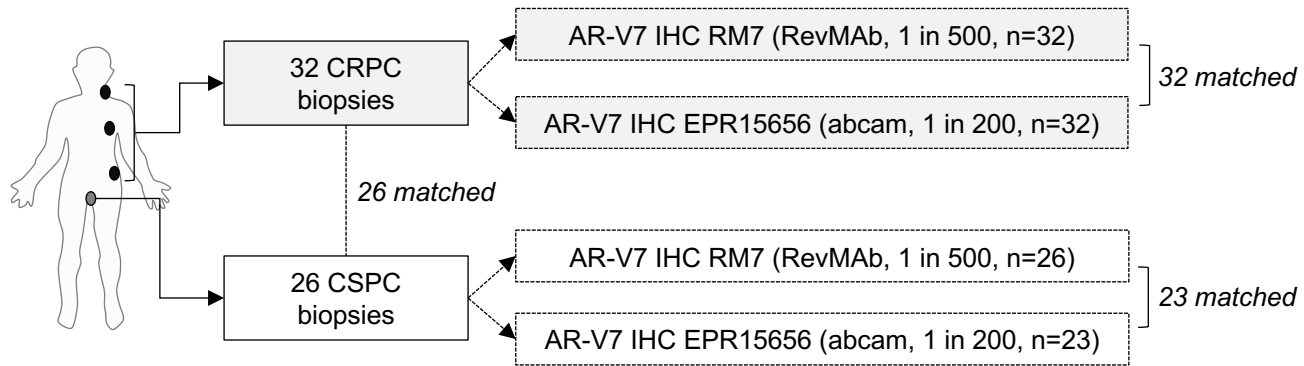

Supplement: ccr-22-0851_supplementary_figure_s2_supps2.pdf [file ccr-22-0851_supplementary_figure_s2_supps2.pdf]

# Supplementary figure 3

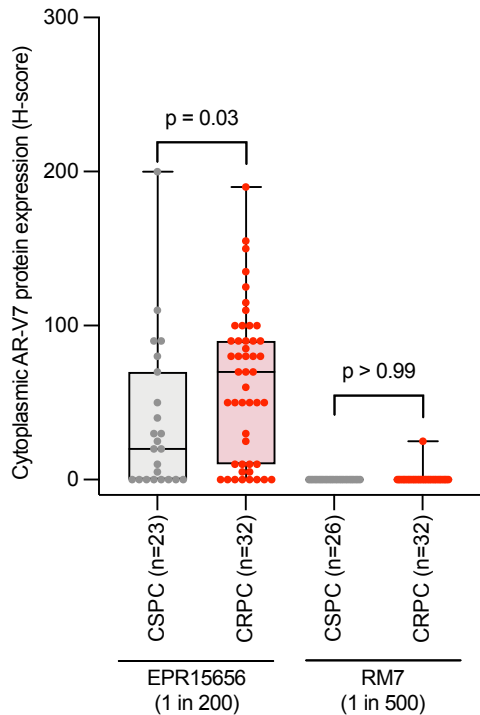

Supplement: ccr-22-0851_supplementary_figure_s3_supps3.pdf [file ccr-22-0851_supplementary_figure_s3_supps3.pdf]

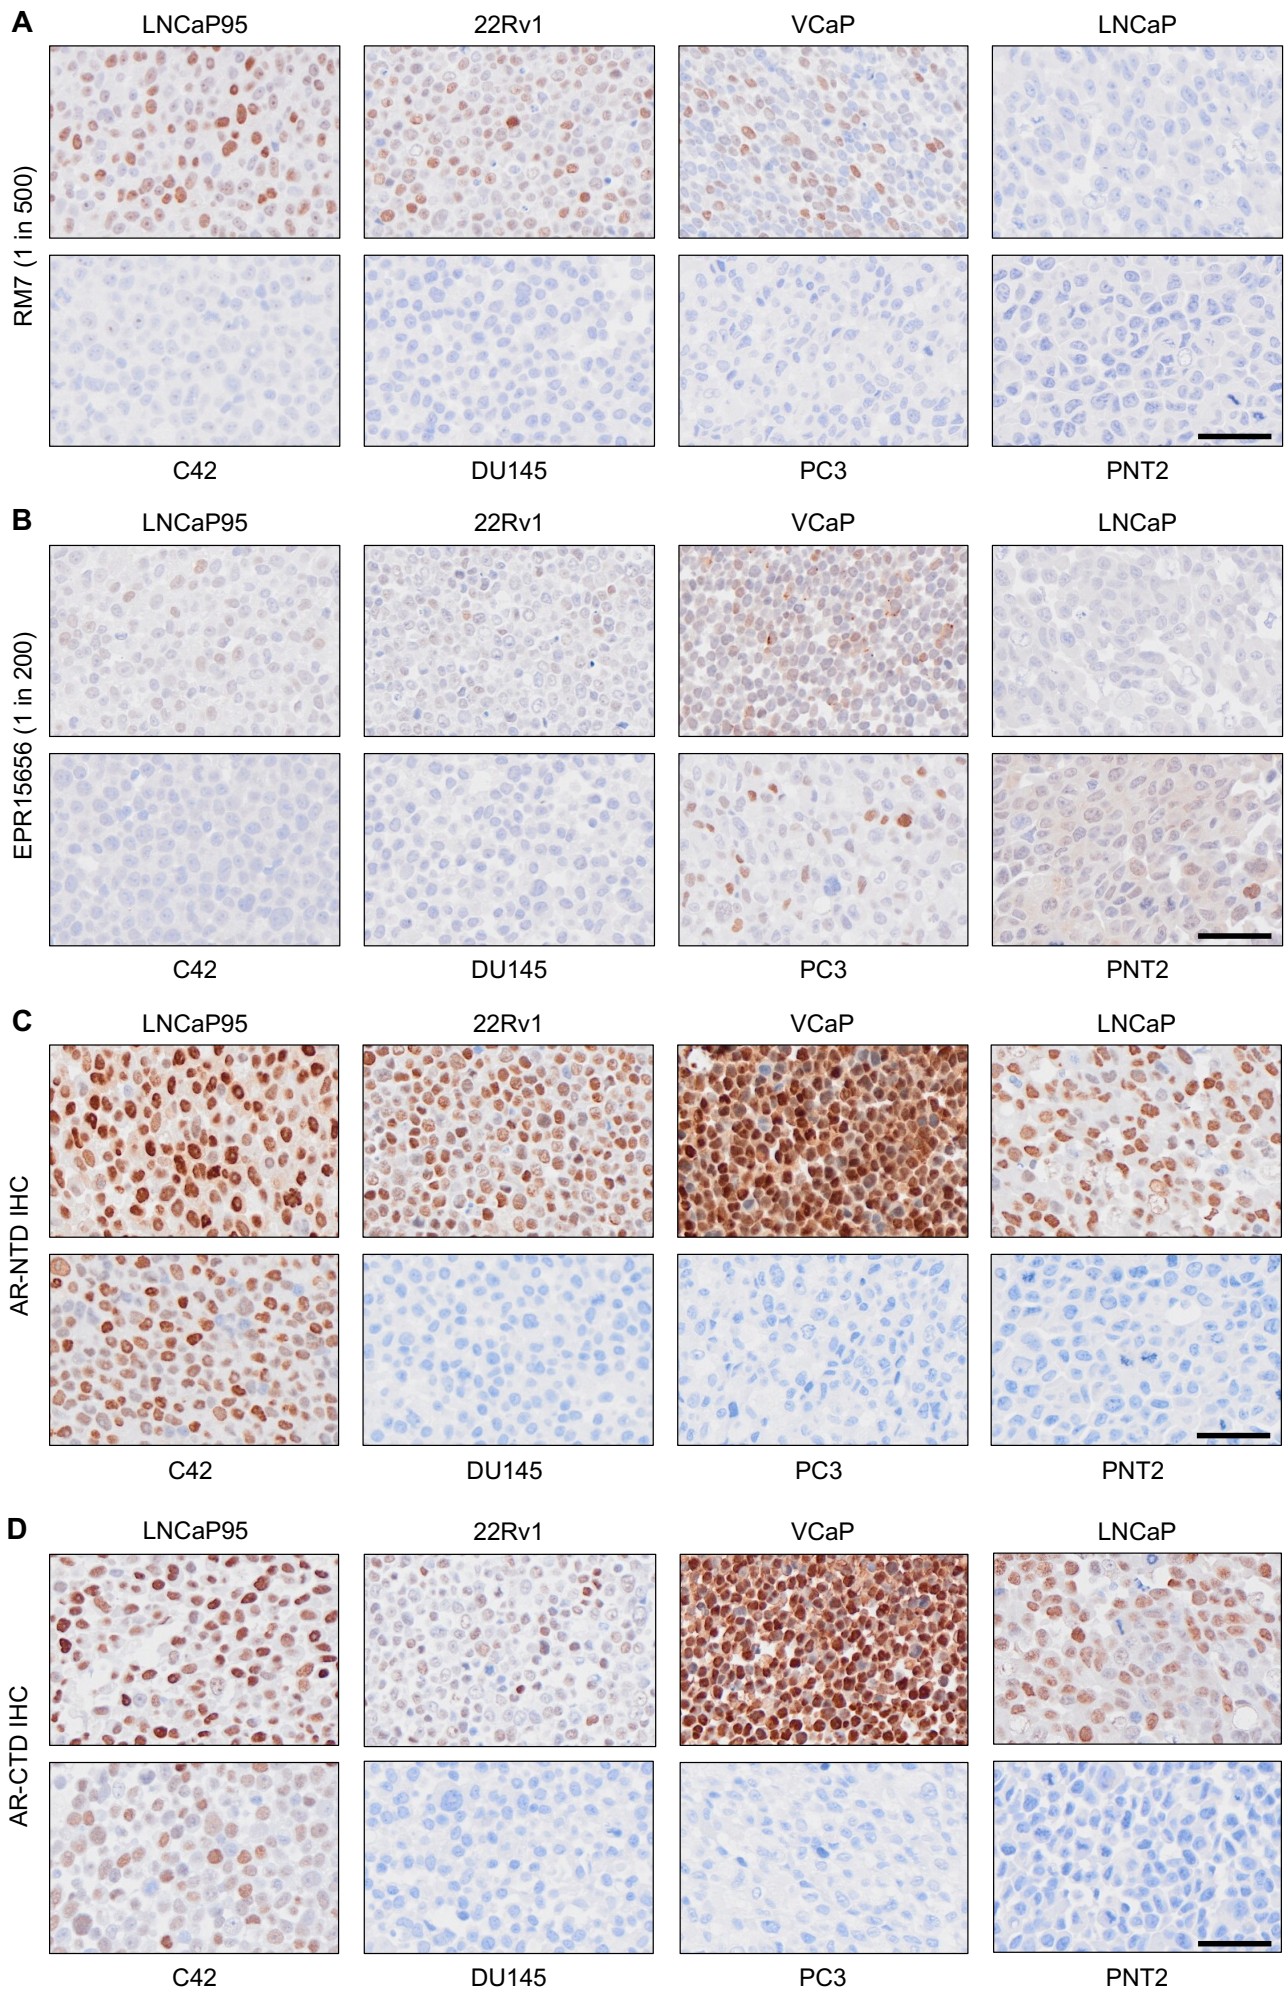

Supplement: ccr-22-0851_supplementary_figure_s4_supps4.pdf [file ccr-22-0851_supplementary_figure_s4_supps4.pdf]

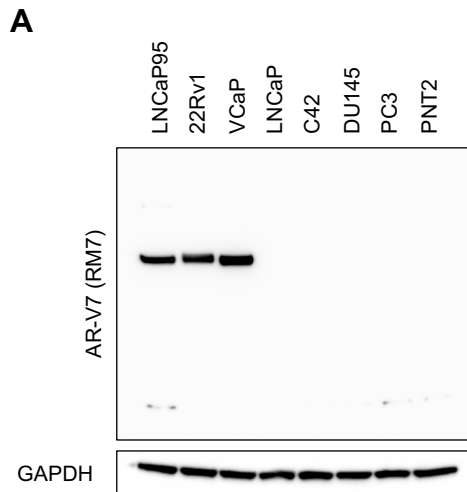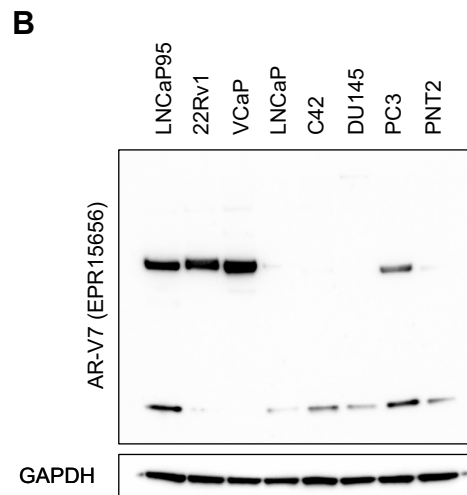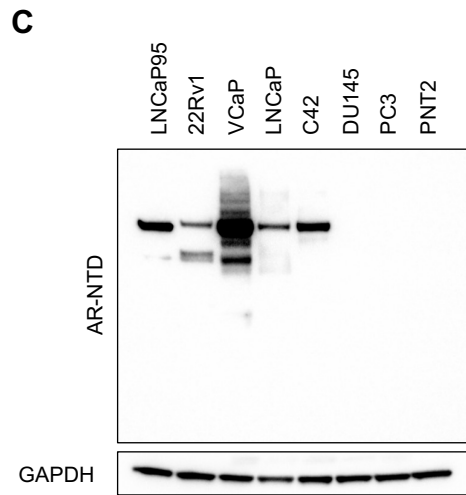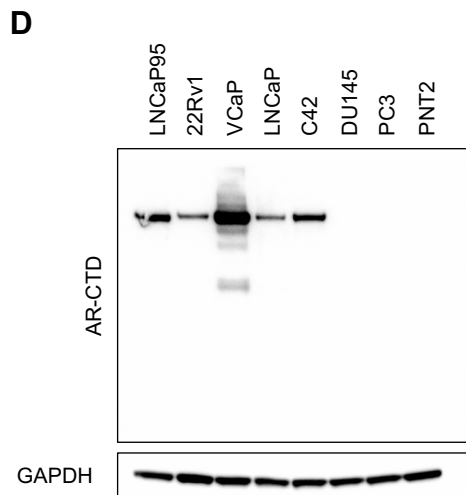

Supplement: ccr-22-0851_supplementary_figure_s5_supps5.pdf [file ccr-22-0851_supplementary_figure_s5_supps5.pdf]

**A**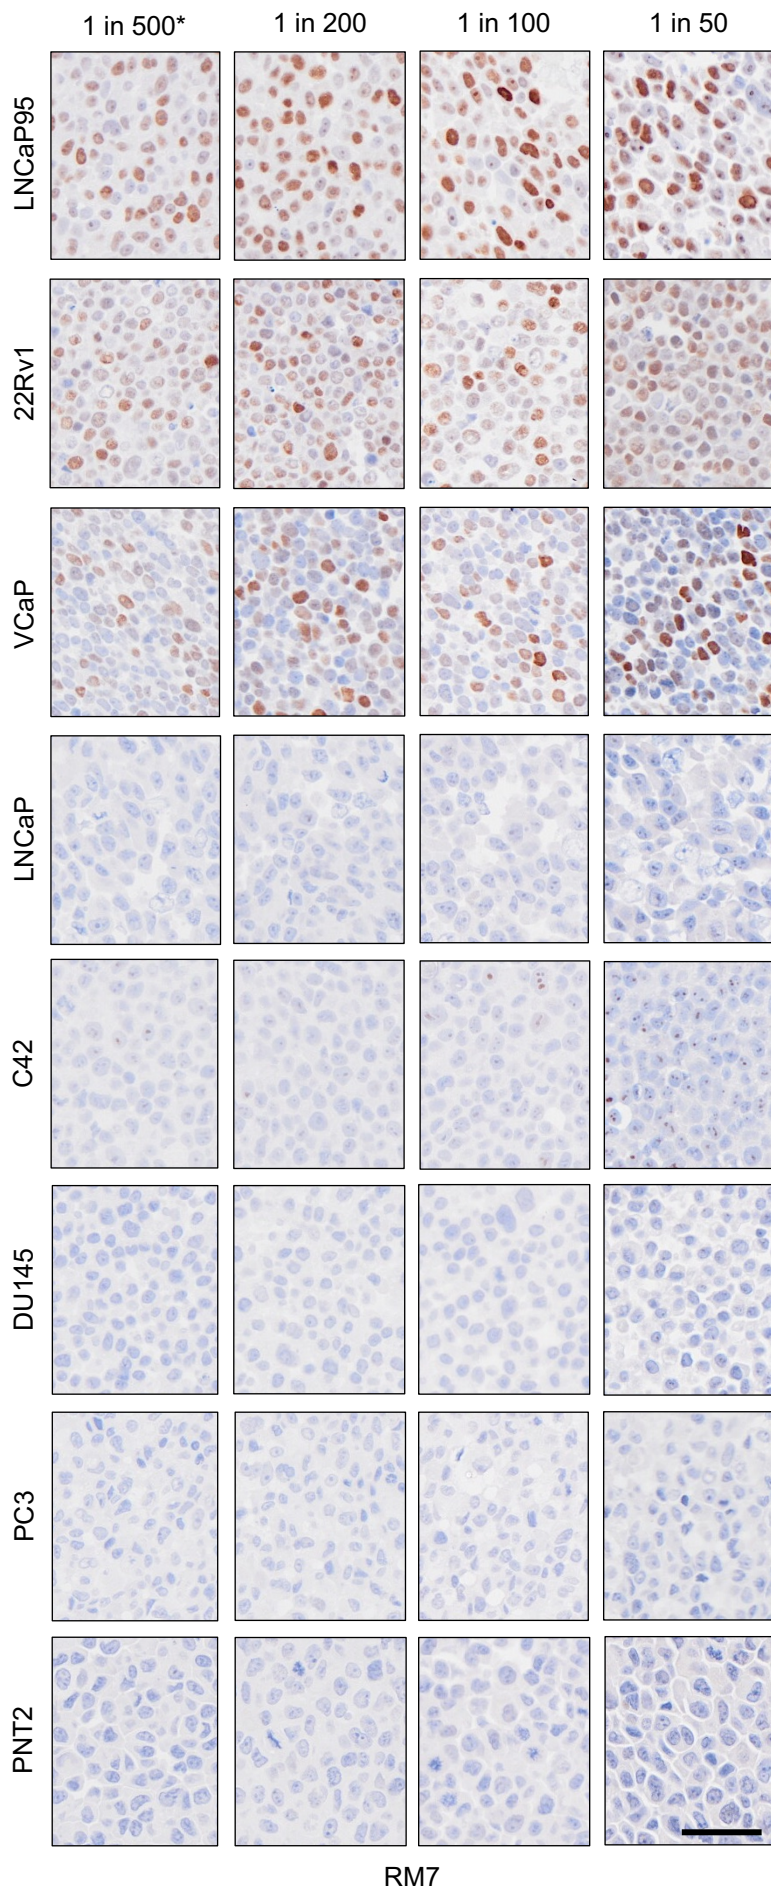**B**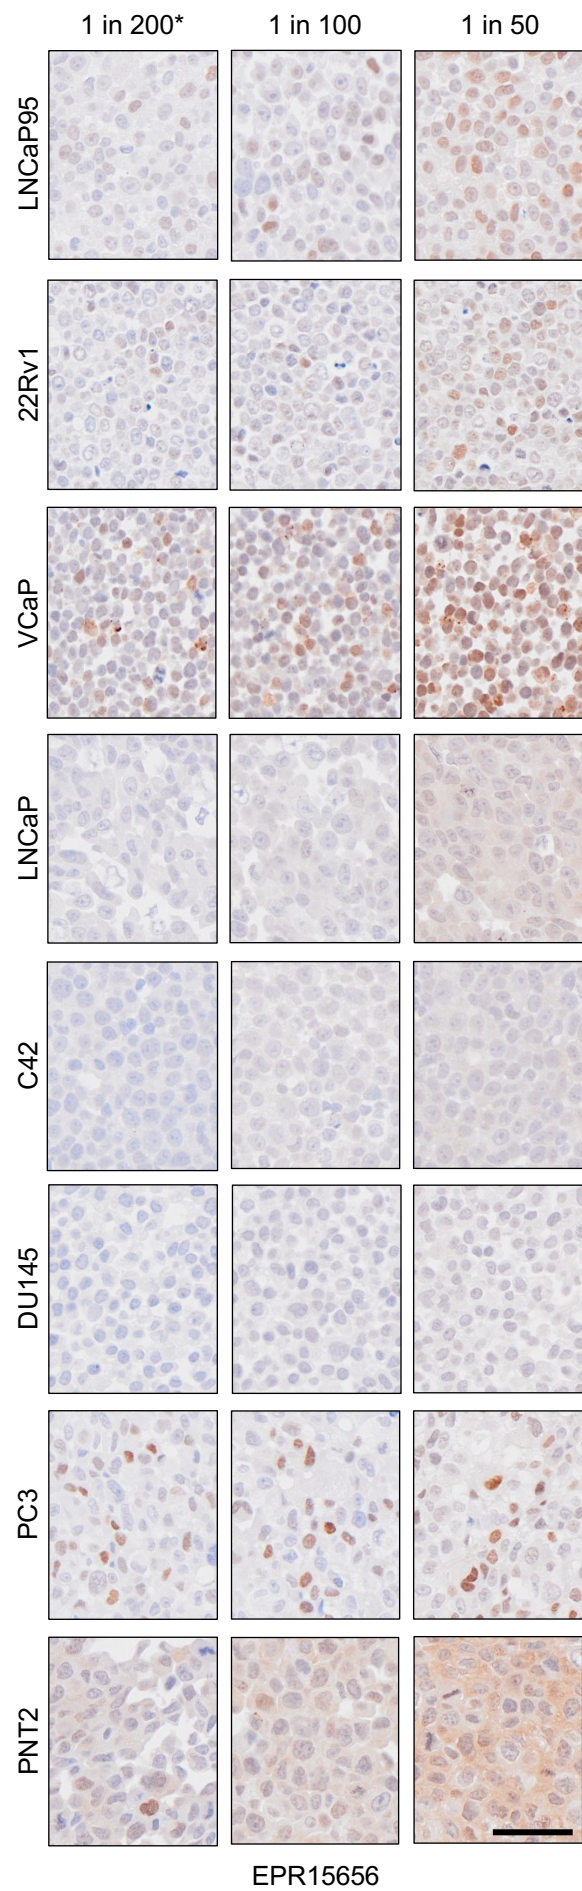

Supplement: ccr-22-0851_supplementary_figure_s7_supps7.pdf [file ccr-22-0851_supplementary_figure_s7_supps7.pdf]

**A**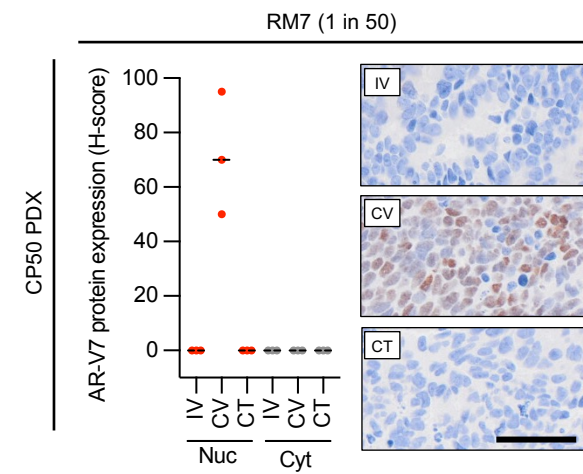**B**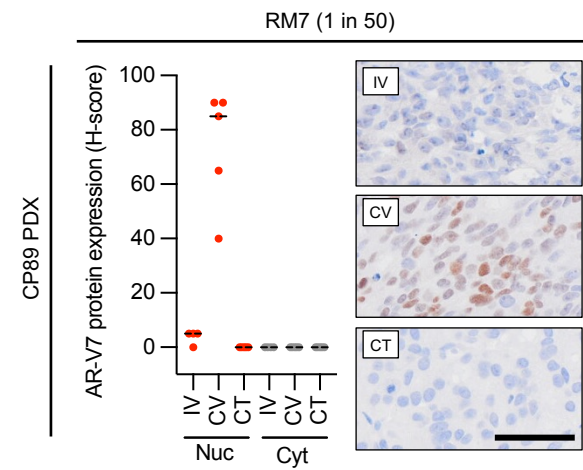**C**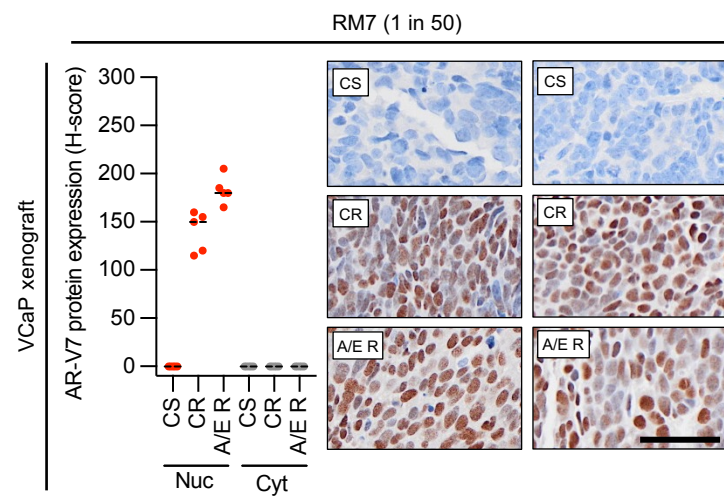

Supplement: ccr-22-0851_supplementary_figure_s8_supps8.pdf [file ccr-22-0851_supplementary_figure_s8_supps8.pdf]

**A**

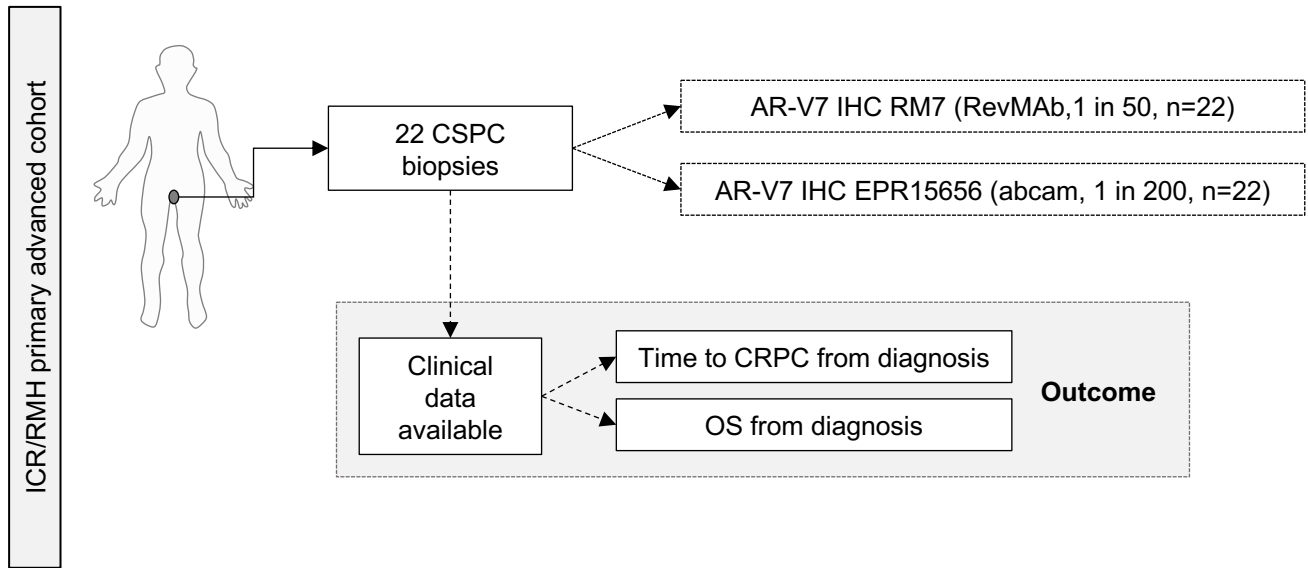

**B**

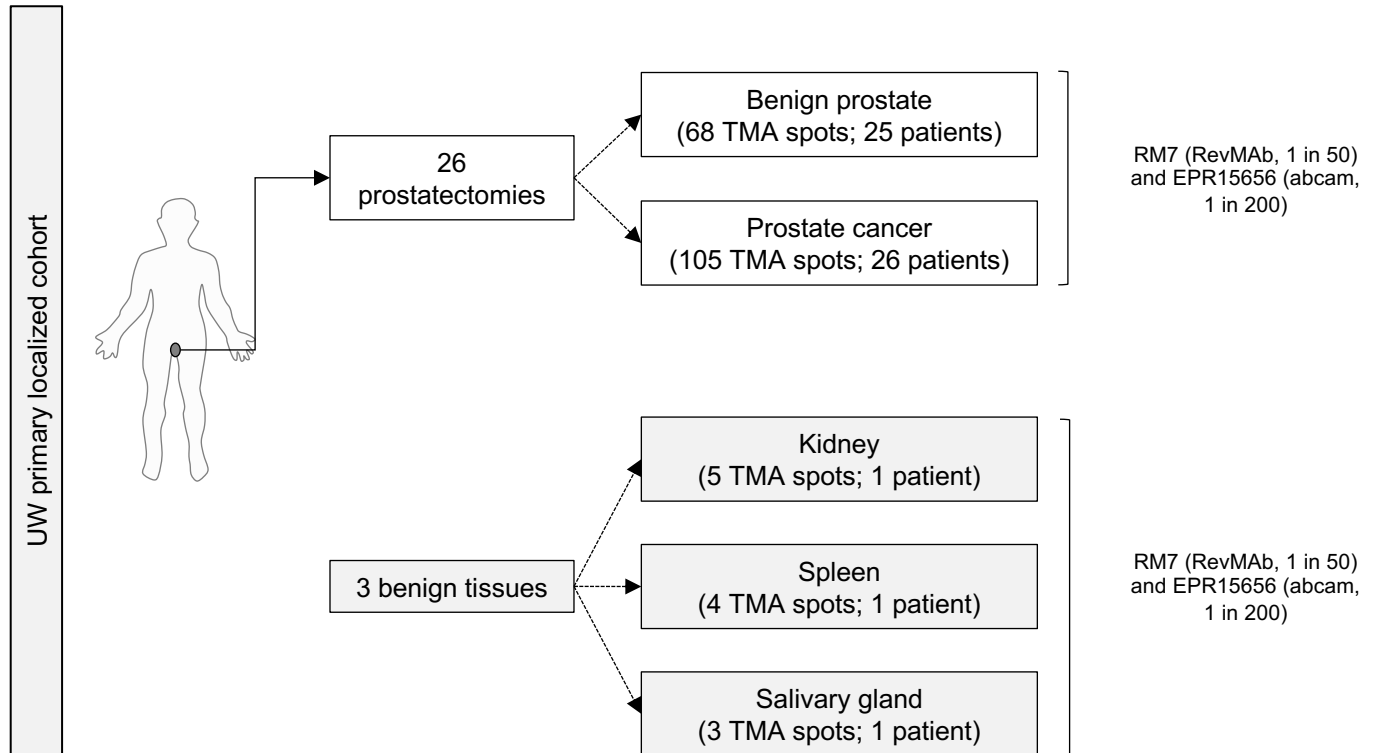

Supplement: ccr-22-0851_supplementary_figure_s9_supps9.pdf [file ccr-22-0851_supplementary_figure_s9_supps9.pdf]
